# Supplementary material for: Diffusion Smart-seq3 of breast cancer spheroids to explore spatial tumor biology and test evolutionary principles of tumor heterogeneity
Source: Springer Nature journal article supplement (doi:10.1038/s41598-024-83989-x), 2025-01-30
Supplement: MOESM1 [file 41598_2024_83989_MOESM1_ESM.pdf]

# 1 Supplementary methods

## 1.1 Inferring spatial gene regulation from Smart-seq3D data

Smart-seq3D quantifies (i) the number of Unique Molecular Identifiers (UMIs)  $n_{gc}$  of gene  $g$  in the cell  $c$ , and (ii) the radial position  $r_c \in [0, 1]$  of that cell. From this, we wish to infer the spatial regulation functional  $f_g(r)$  which indicates the fractional abundance of mRNAs from gene  $g$  in the transcriptome of cells found at position  $r$  of the spheroid.

The challenge in inferring  $f_g$  from  $n_{gc}$  is that  $n_{gc}$  is a stochastic quantity: it is related to  $f_g$  with random noise due to (i) stochasticity in gene expression and (ii) the single cell transcriptomics sampling process (here by Smart-seq3xpress) [1, 2, 3].

We address this using probabilistic inference [4]. Specifically, from the Smart-seq3D data  $n_{gc}$  and  $r_c$ , we seek to determine the likeliest spatial regulation function, parameterized as  $f_g(r) = \alpha + \beta r + \gamma r^2$ . Here,  $\alpha = f_g(0)$  represents the fractional abundance of gene  $g$  in cells located in spheroid core.  $\beta$  is the linear spatial regulation trend.  $\gamma$  represents the quadratic spatial regulation trend. Note that, in this section, we use  $\alpha, \beta, \gamma$  instead of  $a, b, c$  for the gene expression in the core  $a$ , the linear trend  $b$  and the quadratic trend  $c$  so as not to confuse the quadratic trend  $c$  with the cell  $c$ .

Using Bayes' theorem, the probability of the parameters  $\alpha, \beta, \gamma$  given the Smart-seq3D data  $n_{gc}, r_c$  can be written as

$$P(\alpha, \beta, \gamma | n_{gc}, r_c) = \frac{P(n_{gc}, r_c | \alpha, \beta, \gamma) P(\alpha, \beta, \gamma)}{P(n_{gc}, r_c)}$$

Here,  $P(n_{gc}, r_c)$  does not depend on the parameters  $\alpha, \beta, \gamma$ . Because of this, inferring the likeliest parameters  $\alpha, \beta, \gamma$  by maximizing the left side of the above equation can ignore the term  $P(n_{gc}, r_c)$ .

To define  $P(n_{gc}, r_c | \alpha, \beta, \gamma)$ , we initially explored a Poisson distribution

$$P(n_{gc}, r_c | \alpha, \beta, \gamma) = \frac{\mu^{n_{gc}} e^{-\mu}}{n_{gc}!}$$

with mean  $\mu = f_g(r | \alpha, \beta, \gamma) N_c$  with  $N_c = \sum_g n_{gc}$  the total number of UMIs in cell  $c$ , following previous work [3]. However, upon simulating genes from best-fitted distributions, we observed that modeling  $n_{gc}$  as a Poisson distribution underestimates the variance in gene expression. Following previous work on stochasticity in gene expression [1, 2], we thus model  $n_{gc}$  as a negative binomial distribution,

$$P(n_{gc}, r_c | \alpha, \beta, \gamma, \sigma) = \binom{n_{gc} + \frac{\mu^2}{\sigma^2 - \mu} - 1}{n_{gc}} \left(1 - \frac{\mu}{\sigma^2}\right)^{n_{gc}} \left(\frac{\mu}{\sigma^2}\right)^{\mu^2/(\sigma^2 - \mu)}$$

with  $\sigma$  the variance of gene  $g$ . In addition, we employ a flat, non-informative prior on  $\alpha$  and Gaussian priors on  $\beta$  and  $\gamma$ ,

$$\log P(\alpha, \beta, \gamma) = k - \frac{1}{2} \left(\frac{\beta}{10^{-3}}\right)^2 - \frac{1}{2} \left(\frac{\gamma}{10^{-3}}\right)^2$$

where  $k$  is a constant independent of  $\alpha, \beta, \gamma$ . This prior assumes no spatial trend (mean 0) until we see the Smart-seq3D data and formalizes that most genes have spatial trends smaller than  $10^{-3}$ . The reason for this is that mRNAs from genes with highest expression have fractional abundance less than  $10^{-3}$  (Fig. 2a-b). Thus, the difference in expression between radial positions where the gene is most and least expressed cannot exceed  $10^{-3}$ . We find that this prior helps stabilize numerical parameter optimization, in particular for genes with too little UMIs to identify spatial regulation with high confidence levels.

Numerically, we optimize  $L := \log P(n_{gc}, r_c | \alpha, \beta, \gamma, \sigma) + \log P(\alpha, \beta, \gamma)$  for  $\alpha, \beta, \gamma, \sigma$  one gene at a time using the Nedler-Mead algorithm implemented in the `optim()` function of the R software. To facilitate stable convergence to optimal likelihood, we first maximize  $L$  under the constraints  $\gamma = 0$  (no quadratic trend, only linear trend) and  $\sigma = 1$  (Poisson distribution). From the resulting optimal  $(\alpha, \beta)$  as a starting point, we then optimize the full parameter set

$(\alpha, \beta, \gamma, \sigma)$  using the same approach. Simulating gene expression using the best-fitted negative binomial distribution produces spatial UMI counts that faithfully mimic UMI counts observed in the data (Fig. 2).

Only genes with an average of at least 1 UMI per cell are used for inference: genes with an average of less than 1 UMI per cell provide too little data to estimate spatial regulation.

To obtain confidence intervals on the parameters  $\alpha, \beta, \gamma$ , we compute the Hessian of the log-likelihood for the best fitting parameters. The inverse square root of the diagonal terms of the Hessian estimates the standard deviation of the parameters — the uncertainty on these parameters — following Wilks' theorem [4].

The standard deviation of the parameters estimated in this fashion is used to compute a p-value to test that the quadratic and linear trends of each gene is non-zero. For the quadratic trend  $\gamma$ , for example,

$$p = 2(1 - \Phi(|\gamma|/\sigma_\gamma))$$

with  $\Phi(x)$  the cumulative standard Gaussian distribution function. The factor 2 accounts for bi-lateral testing of upward or downward trends.

To control for the false discovery rate (fdr) in multiple hypothesis testing, we apply the Benjamini-Hochberg correction to the concatenation of all p-values from all genes. Spatial genes are defined as genes with a log likelihood  $L > -7500$  (following visual examination of the goodness of fit of genes with different log likelihood, Fig. S2a), a fdr < 10% for either linear or quadratic trends, and at least a 30% difference in gene expression across radial positions.

## 1.2 Classifying genes' spatial expression pattern

We classify genes into core, peripheral, intermediate and extrema spatial expression patterns based on the spatial regulation function  $f_g(r) = a + br + cr^2$  inferred for each gene  $g$ . For a *core*-expressed gene  $g$ ,  $f_g(r)$  is maximal in the core  $r = 0$  and decreases with increasing  $r$ . Therefore,

$$\frac{df}{dr} < 0, r \in [0, 1] \Leftrightarrow b < 0 \wedge b + 2c < 0.$$

Conversely, for a *peripheral* gene,

$$\frac{df}{dr} > 0, r \in [0, 1] \Leftrightarrow b > 0 \wedge b + 2c > 0.$$

We define a gene expressed in *intermediate* layers as a gene whose expression peaks at a radial position  $1/3 < r^* < 2/3$

$$\left. \frac{df}{dr} \right|_{r=r^*} = 0, \left. \frac{df^2}{dr^2} \right|_{r=r^*} < 0, 1/3 < r^* < 2/3$$

which implies

$$c < 0 \wedge 1/3 < -b/2c < 2/3.$$

Conversely, we define an *extrema*-expressed gene as a gene with minimal expression at a radial position  $1/3 < r^* < 2/3$

$$\left. \frac{df}{dr} \right|_{r=r^*} = 0, \left. \frac{df^2}{dr^2} \right|_{r=r^*} > 0, 1/3 < r^* < 2/3$$

which implies

$$c > 0 \wedge 1/3 < -b/2c < 2/3.$$

## References

1. Raj, A., Peskin, C. S., Tranchina, D., Vargas, D. Y. & Tyagi, S. Stochastic mRNA synthesis in mammalian cells. *PLoS biology* **4**, e309, DOI: [10.1371/journal.pbio.0040309](https://doi.org/10.1371/journal.pbio.0040309) (2006). Publisher: Public Library of Science.
2. Shahrezaei, V. & Swain, P. S. Analytical distributions for stochastic gene expression. *Proc. Natl. Acad. Sci. United States Am.* **105**, 17256–61, DOI: [10.1073/pnas.0803850105](https://doi.org/10.1073/pnas.0803850105) (2008). ArXiv: 0812.3344 ISBN: 1091-6490 (Electronic)\n0027-8424 (Linking).
3. Breda, J., Zavolan, M. & van Nimwegen, E. Bayesian inference of gene expression states from single-cell RNA-seq data. *Nat. Biotechnol.* **39**, 1008–1016, DOI: [10.1038/s41587-021-00875-x](https://doi.org/10.1038/s41587-021-00875-x) (2021). Publisher: Nature Publishing Group.
4. Sivia, D. & Skilling, J. Data Analysis: A Bayesian Tutorial. *Technometrics* **40**, 155, DOI: [10.2307/1270652](https://doi.org/10.2307/1270652) (1998). ISBN: 0198568320.
